# Supplementary material for: Prevalence of human papillomavirus infection and type distribution among Uyghur females in Xinjiang, northwest China
Source: PubMed Central journal article supplement — Oncol Lett. 2020 Jul 16;20(4):25. doi: 10.3892/ol.2020.11886 (PMC7406881; doi:10.3892/ol.2020.11886), 2020-07-16
Supplement: Supplementary_Data.pdf [file Supplementary_Data.pdf]

Table I. Universal primers sequence and product length of amplification.

| Gene                           | Primer sequences                                                                    | Amplification product length |
|--------------------------------|-------------------------------------------------------------------------------------|------------------------------|
| HPV universal primer (MY09/11) | MY09 F.5'-CGTCCMARRGGAWACTGATC-3'<br>MY11 R.5'-GCMCAGGGWCATAAYAATGG-3'              | 450 bp                       |
| $\beta$ -Globin                | F.5'-ATCACTTAGACCTCACCCCTGTGGAGCCATACCC-3'<br>R.5'-TCCTGAGGAGAAGTCTGCCGTTACTGCCC-3' | 200 bp                       |

Table II. Distribution of HPV types in multiple infection, n (%).

| Multiple infection types | HPV types                | n (%)       |
|--------------------------|--------------------------|-------------|
| dual infection           |                          | 169 (84.50) |
|                          | HPV16 and 54             | 30 (15.00)  |
|                          | HPV16 and 31             | 16 (8.00)   |
|                          | HPV16 and 68             | 12 (6.00)   |
|                          | HPV31 and 52             | 7 (3.50)    |
|                          | HPV59 and 45             | 5 (2.50)    |
|                          | others                   | 99 (49.50)  |
| triple infection         |                          | 26 (13.00)  |
|                          | HPV52, 68 and 39         | 4 (2.00)    |
|                          | HPV16, 39 and 52         | 3 (1.50)    |
|                          | HPV16, 31 and 59         | 2 (1.00)    |
|                          | others                   | 17 (8.50)   |
| four infection           |                          | 4 (2.00)    |
|                          | HPV16, 31, 45 and 68     | 1 (0.50)    |
|                          | HPV35, 45, 51 and 11     | 1 (0.50)    |
|                          | HPV6, 35, 51 and 56      | 1 (0.50)    |
|                          | HPV51, 52, 54 and 68     | 1 (0.50)    |
| five infection           |                          | 1 (0.50)    |
|                          | HPV52, 68, 83, 40 and 54 | 1 (0.50)    |

HPV, human papillomavirus.
